# Supplementary material for: Influence of Advanced Organ Support (ADVOS) on Cytokine Levels in Patients with Acute-on-Chronic Liver Failure (ACLF)
Source: MDPI journal article supplement (doi:10.3390/jcm11102782), 2022-05-15
Supplement: s1 [file s1]

Supplementary Table S1. Detoxification efficiency of the ADVOS treatment of bilirubin and regular laboratory parameters as assessed by standard laboratory in the clinical routine.

|       |         | Bilirubin<br>(mmol/L) | Creatinin<br>(mmol/L) | BUN<br>(mmol/L)    | Potassium<br>(mmol/L) | Sodium<br>(mmol/L) |
|-------|---------|-----------------------|-----------------------|--------------------|-----------------------|--------------------|
| ADVOS | Before  | 23.4 (17; 34.7)       | 2.75 (2.3;<br>4.6)    | 43 (35; 71.3)      | 4 (2.9; 5.2)          | 136 (130;<br>143)  |
|       | After   | 22 (17.8; 33)         | 3.3 (2.1; 3.8)        | 32 (22.8;<br>60.5) | 3.9 (3.4;<br>4.3)     | 133 (130;<br>138)  |
|       | p-value | 0.65                  | 0.98                  | 0.18               | 0.78                  | 0.49               |

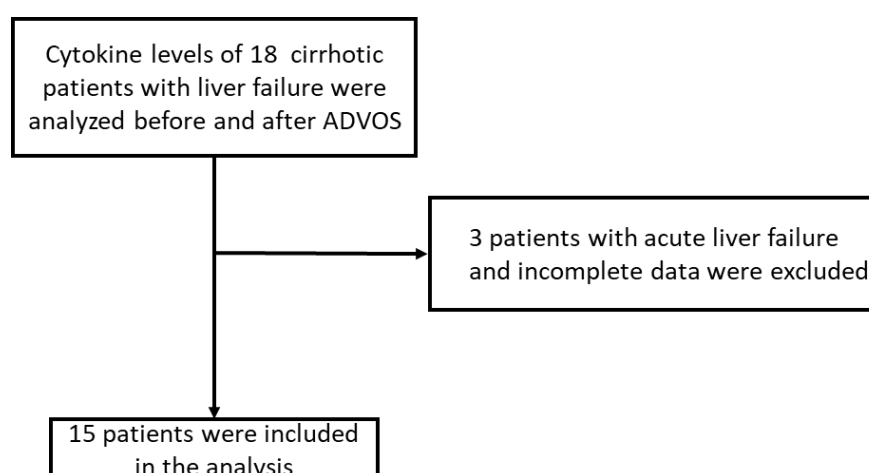

Supplementary Figure S1: Flowchart of the study.

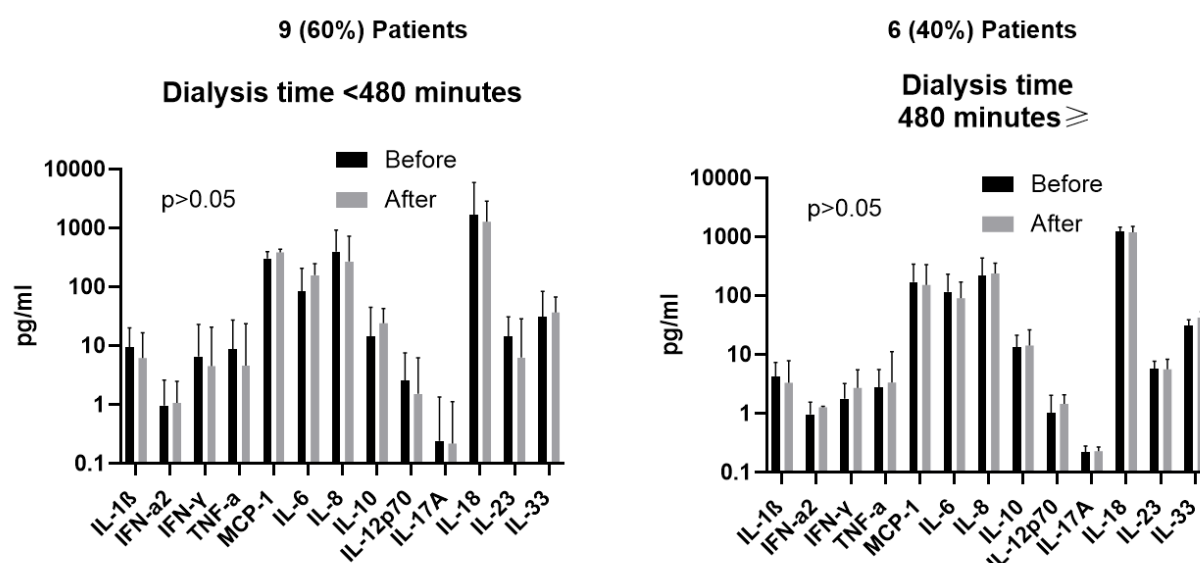

Supplementary Figure S2: Concentration of cytokines before versus after ADVOS treatment in patients with ACLF stratified for dialysis time as quantified by multiplex analysis.

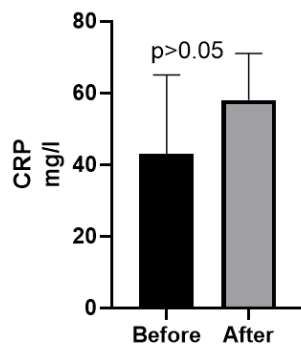

Supplementary Figure S3: Level of C-reactive protein (CRP) before versus after ADVOS treatment as assessed by standard laboratory.

Supplementary Table S2. Seize and isoelectric point comparison of selected cytokines versus albumin as reference (PhosphoSitePlus, can be found under <https://www.phosphosite.org/homeAction>, accessed on 4 February 2022).

|                 | Isoelectric point | Dalton | Size versus albumin (%) |
|-----------------|-------------------|--------|-------------------------|
| MCP-1           | 9.40              | 11,025 | 16                      |
| IL-8            | 9.10              | 11,098 | 16                      |
| IL-17A          | 8.82              | 17,504 | 25                      |
| IL-10           | 8.19              | 20,517 | 30                      |
| IL-23           | 6.02              | 20,730 | 30                      |
| IFN- $\alpha$ 2 | 6.32              | 21,550 | 31                      |
| IL-18           | 4.54              | 22,326 | 32                      |
| IL-6            | 6.17              | 23,718 | 34                      |
| IL-12p70        | 6.21              | 24,874 | 36                      |
| TNF- $\alpha$   | 6.44              | 26,000 | 37                      |
| IL-1beta        | 4.70              | 30,748 | 44                      |
| IL-33           | 8.9               | 30,759 | 44                      |
| IFN- $\gamma$   | 9.50              | 45,000 | 65                      |
| Albumin         | 5.92              | 69,367 | 100                     |
